# Supplementary material for: A Circular RNA Binds To and Activates AKT Phosphorylation and Nuclear Localization Reducing Apoptosis and Enhancing Cardiac Repair
Source: PubMed Central journal article supplement — Theranostics. 2017 Aug 29;7(16):3842–55. doi: 10.7150/thno.19764 (PMC5667408; doi:10.7150/thno.19764), 2017-08-29
Supplement: thnov07p3842s1.pdf [file thnov07p3842s1.pdf]

Table S1. The circ-Amot1-AKT1 Distance

| N(res No) | atom | chain | AA (res No) | atom | chain | distance | type      |
|-----------|------|-------|-------------|------|-------|----------|-----------|
| U 40      | OP1  | A     | TYR 152     | OH   | B     | 2.41     | Phil phil |
| U 40      | OP2  | A     | LEU 155     | CD2  | B     | 3.21     | Phil phob |
| G 41      | OP2  | A     | LYS 158     | CD   | B     | 2.44     | Phil phil |
| A 42      | OP1  | A     | LYS 182     | NZ   | B     | 3.45     | Phil phil |
| A 45      | O2'  | A     | GLU 314     | OE1  | B     | 3.17     | Phil phil |
| A 45      | N7   | A     | PHE 358     | CZ   | B     | 2.69     | Phil phob |
| A 45      | C2   | A     | LEU 357     | CD2  | B     | 1.46     | Phil phob |
| A 45      | O2'  | A     | PRO 313     | CG   | B     | 1.94     | Phil phob |
| A 45      | N6   | A     | HIS 354     | CB   | B     | 1.71     | Phil phil |
| A 45      | OP2  | A     | LYS 297     | CE   | B     | 1.79     | Phil phil |
| U 46      | O4   | A     | TYR 315     | CE1  | B     | 2.86     | Phil phil |
| U 46      | N3   | A     | GLU 278     | OE1  | B     | 2.09     | Phil phil |
| U 77      | O2'  | A     | HIS 220     | ND1  | B     | 2.06     | Phil phil |
| U 77      | C5'  | A     | ASP 221     | OD2  | B     | 2.42     | Phil phil |
| G 78      | OP2  | A     | ARG 222     | CG   | B     | 2.95     | Phil phil |
| G 78      | OP1  | A     | ASP 221     | CG   | B     | 0.8      | Phil phil |
| G 78      | OP2  | A     | THR 219     | OG1  | B     | 3.38     | Phil phil |
| C 79      | OP1  | A     | MET 147     | CE   | B     | 2.43     | Phil phob |
| G 80      | OP1  | A     | PHE 150     | O    | B     | 3.32     | Phil phob |
| G 80      | OP2  | A     | MET 147     | O    | B     | 3.09     | Phil phob |
| G 80      | O5'  | A     | ASN 148     | ND2  | B     | 2.23     | Phil phil |
| G 81      | O6   | A     | THR 146     | OG1  | B     | 3.43     | Phil phil |
| G 81      | OP2  | A     | ASN 148     | OD1  | B     | 1.91     | Phil phil |
| G 81      | OP1  | A     | LYS 170     | NZ   | B     | 2.86     | Phil phil |
| C 82      | OP2  | A     | LYS 170     | CD   | B     | 2.51     | Phil phil |
| C 82      | N4   | A     | ASN 148     | O    | B     | 1.17     | Phil phil |
| C 82      | N4   | A     | GLU 149     | N    | B     | 2.26     | Phil phil |
| A 83      | OP2  | A     | LYS 170     | O    | B     | 3.01     | Phil phil |
| A 83      | N6   | A     | VAL 145     | CA   | B     | 3.09     | Phil phob |
| A 83      | N6   | A     | GLU 149     | OE1  | B     | 0.81     | Phil phil |
| A 83      | C5'  | A     | ALA 171     | CB   | B     | 2.88     | Phil phob |
| C 85      | O2   | A     | ARG 200     | NH2  | B     | 3.23     | Phil phil |
| U 86      | O2   | A     | GLN 203     | NE2  | B     | 3.16     | Phil phil |
| U 86      | O2   | A     | ARG 200     | NH2  | B     | 2.86     | Phil phil |
| G 87      | C1'  | A     | GLN 203     | NE2  | B     | 3.06     | Phil phil |
| A 90      | O3'  | A     | GLU 418     | O    | B     | 2.21     | Phil phil |
| C 91      | OP1  | A     | LYS 420     | CG   | B     | 3.14     | Phil phil |
| C 91      | P    | A     | GLU 418     | O    | B     | 3.21     | Phil phil |
| U 97      | O2'  | A     | LYS 284     | CE   | B     | 1.87     | Phil phil |
| C 99      | C4'  | A     | GLU 228     | OE1  | B     | 1.54     | Phil phil |
| C 99      | O3'  | A     | ALA 212     | CB   | B     | 2.44     | Phil phob |
| C 99      | O2'  | A     | ARG 206     | NH1  | B     | 2.11     | Phil phil |
| C 99      | OP2  | A     | ARG 174     | CD   | B     | 3.41     | Phil phil |
| A 100     | OP2  | A     | LYS 214     | CB   | B     | 2.24     | Phil phil |
| A 100     | O4'  | A     | ARG 206     | CD   | B     | 3.33     | Phil phil |
| A 100     | OP1  | A     | GLU 228     | N    | B     | 2.4      | Phil phil |
| A 100     | O2'  | A     | LEU 202     | O    | B     | 1.26     | Phil phob |
| A 100     | OP1  | A     | ALA 212     | O    | B     | 1.22     | Phil phob |
| A 100     | OP1  | A     | MET 227     | C    | B     | 3.16     | Phil phob |
| A 100     | N3   | A     | GLN 203     | CG   | B     | 2.35     | Phil phil |
| A 100     | O3'  | A     | LEU 213     | O    | B     | 0.81     | Phil phob |
| G 101     | OP2  | A     | TYR 215     | N    | B     | 2.18     | Phil phil |
| G 101     | OP1  | A     | LEU 213     | CG   | B     | 0.92     | Phil phob |
| G 101     | O3'  | A     | ASN 199     | O    | B     | 2.76     | Phil phil |
| G 101     | O3'  | A     | SER 216     | OG   | B     | 2.97     | Phil phil |
| G 101     | OP2  | A     | LYS 214     | N    | B     | 1.34     | Phil phil |
| G 101     | C4'  | A     | LEU 202     | CD2  | B     | 0.6      | Phil phob |
| G 101     | C2   | A     | ARG 200     | NH1  | B     | 0.6      | Phil phil |
| G 101     | OP2  | A     | VAL 226     | O    | B     | 3.17     | Phil phob |
| C 102     | N4   | A     | TYR 215     | CE1  | B     | 2.23     | Phil phil |
| C 102     | C5'  | A     | ASN 199     | N    | B     | 3.43     | Phil phil |
| C 102     | OP2  | A     | SER 216     | O    | B     | 2.07     | Phil phil |
| C 102     | O4'  | A     | ARG 200     | CG   | B     | 2.84     | Phil phil |
| G 103     | O6   | A     | VAL 145     | N    | B     | 1.13     | Phil phob |
| G 104     | O6   | A     | THR 146     | OG1  | B     | 1.37     | Phil phil |
| G 104     | O6   | A     | GLU 149     | OE2  | B     | 2.14     | Phil phil |
| G 104     | N7   | A     | VAL 145     | C    | B     | 3.08     | Phil phob |
| C 105     | N4   | A     | THR 146     | CG2  | B     | 3.16     | Phil phil |

The table reporting a list of atoms "in contact" (within the distance cutoff) with relative distances less than 3.5Å.

Table S3. Accessible Surface Area table of circ-Amot1-Akt1 complex

|                                                                    |        |
|--------------------------------------------------------------------|--------|
| Buried area upon the complex formation (Å <sup>2</sup> )           | 4527.2 |
| Buried area upon the complex formation (%)                         | 9.08   |
| Interface area (Å <sup>2</sup> )                                   | 2263.6 |
| Interface area circ-AMOTL1 (%)                                     | 7.24   |
| Interface area AKT1 (%)                                            | 12.17  |
| POLAR Buried area upon the complex formation (Å <sup>2</sup> )     | 1888.0 |
| POLAR Interface (%)                                                | 41.70  |
| POLAR Interface area (Å <sup>2</sup> )                             | 944.0  |
| NON POLAR Buried area upon the complex formation (Å <sup>2</sup> ) | 2639.2 |
| NON POLAR Interface (%)                                            | 58.30  |
| NON POLAR Interface area (Å <sup>2</sup> )                         | 1319.6 |
| Residues at the interface_total (n)                                | 93     |
| Residues at the interface_circ-AMOTL1                              | 34     |
| Residues at the interface_AKT1                                     | 59     |

Table S5. circ-Amot1-AKT1 interaction overview

|                                               |    |
|-----------------------------------------------|----|
| Number of interacting residues circ-AMOTL1    | 25 |
| Number of interacting residues AKT1           | 41 |
| Number of hydrophilic-hydrophobic interaction | 19 |
| Number of hydrophilic-hydrophilic interaction | 49 |
| Number of hydrophobic-hydrophobic interaction | 0  |

Table S2. The circ-Amot1-PDK1 Distance

| N(res No) | atom | chain | AA (res No) | atom | chain | distance | type      |
|-----------|------|-------|-------------|------|-------|----------|-----------|
| G 3       | N2   | A     | GLY 285     | CA   | B     | 2.77     | Phil phob |
| A 4       | O2'  | A     | GLY 285     | N    | B     | 3.35     | Phil phob |
| A 4       | O2'  | A     | LEU 289     | CD2  | B     | 2.69     | Phil phob |
| A 4       | C2   | A     | ASN 286     | ND2  | B     | 2.42     | Phil phil |
| A 5       | C4   | A     | LEU 289     | CD1  | B     | 0.82     | Phil phob |
| A 5       | C2   | A     | TYR 288     | CD2  | B     | 2.32     | Phil phil |
| A 5       | C2'  | A     | GLN 292     | OE1  | B     | 2.12     | Phil phil |
| G 6       | O4'  | A     | GLN 292     | OE1  | B     | 2.6      | Phil phil |
| U 14      | O2   | A     | ASN 286     | ND2  | B     | 2.33     | Phil phil |
| U 15      | O4'  | A     | ASN 286     | CB   | B     | 1.67     | Phil phil |
| U 15      | C4'  | A     | GLU 287     | N    | B     | 3.07     | Phil phil |
| U 15      | O2'  | A     | GLY 285     | O    | B     | 1.53     | Phil phob |
| U 17      | N3   | A     | GLN 247     | NE2  | B     | 2.49     | Phil phil |
| U 17      | O4   | A     | THR 245     | CG2  | B     | 2.97     | Phil phil |
| A 18      | C8   | A     | GLY 285     | O    | B     | 2.91     | Phil phob |
| C 28      | O3'  | A     | ILE 87      | CD1  | B     | 2.89     | Phil phob |
| C 28      | C4'  | A     | GLU 90      | OE2  | B     | 2.25     | Phil phil |
| C 29      | C5'  | A     | ILE 87      | CD1  | B     | 2.94     | Phil phob |
| G 54      | OP2  | A     | GLU 80      | CB   | B     | 2.62     | Phil phil |
| G 56      | OP1  | A     | LYS 83      | CD   | B     | 2.93     | Phil phil |
| U 68      | O3'  | A     | LYS 77      | CE   | B     | 2.37     | Phil phil |
| U 68      | C5   | A     | PRO 74      | CG   | B     | 1.54     | Phil phob |
| U 69      | O4   | A     | PRO 72      | O    | B     | 3.43     | Phil phob |
| U 69      | OP1  | A     | PHE 147     | CB   | B     | 2.17     | Phil phob |
| U 69      | C5   | A     | PRO 74      | CD   | B     | 2.75     | Phil phob |
| U 69      | C4'  | A     | TYR 146     | O    | B     | 0.99     | Phil phil |
| U 69      | O4   | A     | GLN 73      | CB   | B     | 1.36     | Phil phil |
| U 69      | OP1  | A     | LYS 77      | CE   | B     | 2.59     | Phil phil |
| C 70      | OP1  | A     | THR 148     | CG2  | B     | 2.98     | Phil phil |
| C 70      | N4   | A     | GLN 73      | NE2  | B     | 1.29     | Phil phil |
| C 70      | P    | A     | PHE 147     | CA   | B     | 3.25     | Phil phob |
| C 71      | OP2  | A     | ARG 131     | NH2  | B     | 2.72     | Phil phil |
| C 71      | N4   | A     | GLN 73      | NE2  | B     | 2.71     | Phil phil |
| G 107     | O2'  | A     | ILE 119     | CD1  | B     | 2.85     | Phil phob |
| A 108     | O3'  | A     | GLN 150     | OE1  | B     | 2        | Phil phil |
| A 108     | O3'  | A     | LYS 115     | NZ   | B     | 2.69     | Phil phil |
| U 109     | OP2  | A     | LYS 115     | NZ   | B     | 3.26     | Phil phil |
| U 109     | OP2  | A     | LEU 155     | CD2  | B     | 3.3      | Phil phob |
| U 109     | OP2  | A     | GLN 150     | CD   | B     | 0.78     | Phil phil |
| A 115     | N6   | A     | GLN 73      | CB   | B     | 3.18     | Phil phil |
| A 115     | N6   | A     | PRO 72      | O    | B     | 2.13     | Phil phob |
| C 146     | O3'  | A     | SER 105     | N    | B     | 1.2      | Phil phil |
| C 146     | O2'  | A     | ARG 106     | CG   | B     | 2.62     | Phil phil |
| C 146     | O3'  | A     | THR 104     | C    | B     | 0.4      | Phil phil |
| C 146     | O3'  | A     | ALA 103     | C    | B     | 3.27     | Phil phob |
| C 147     | O5'  | A     | ALA 103     | C    | B     | 0.89     | Phil phob |
| C 147     | OP1  | A     | GLU 101     | O    | B     | 2.08     | Phil phil |
| C 147     | P    | A     | SER 105     | N    | B     | 1.81     | Phil phil |
| C 147     | C5'  | A     | THR 104     | N    | B     | 0.81     | Phil phil |
| C 147     | OP1  | A     | LEU 102     | O    | B     | 2.08     | Phil phob |
| A 148     | OP2  | A     | ALA 103     | CB   | B     | 1.79     | Phil phob |
| A 148     | OP2  | A     | LEU 102     | C    | B     | 3.35     | Phil phob |
| G 149     | OP1  | A     | ARG 78      | NH2  | B     | 3.29     | Phil phil |
| A 171     | N1   | A     | GLU 166     | OE2  | B     | 2.74     | Phil phil |

The table reporting a list of atoms "in contact" (within the distance cutoff) with relative distances less than 3.5Å.

Table S4. Accessible Surface Area table of circ-Amot1-PDK1 complex

|                                                                    |         |
|--------------------------------------------------------------------|---------|
| Buried area upon the complex formation (Å <sup>2</sup> )           | 3920.5  |
| Buried area upon the complex formation (%)                         | 8.94    |
| Interface area (Å <sup>2</sup> )                                   | 1960.25 |
| Interface area circ-AMOTL1 (%)                                     | 6.56    |
| Interface area PDK1 (%)                                            | 14.00   |
| POLAR Buried area upon the complex formation (Å <sup>2</sup> )     | 1730.3  |
| POLAR Interface (%)                                                | 44.13   |
| POLAR Interface area (Å <sup>2</sup> )                             | 865.15  |
| NON POLAR Buried area upon the complex formation (Å <sup>2</sup> ) | 2190.1  |
| NON POLAR Interface (%)                                            | 55.86   |
| NON POLAR Interface area (Å <sup>2</sup> )                         | 1095.05 |
| Residues at the interface_total (n)                                | 101     |
| Residues at the interface_circ-AMOTL1                              | 42      |
| Residues at the interface_PDK1                                     | 59      |

Table S6. circ-Amot1-PDK1 interaction overview

|                                               |    |
|-----------------------------------------------|----|
| Number of interacting residues circ-AMOTL1    | 25 |
| Number of interacting residues PDK1           | 32 |
| Number of hydrophilic-hydrophobic interaction | 21 |
| Number of hydrophilic-hydrophilic interaction | 33 |
| Number of hydrophobic-hydrophobic interaction | 0  |

**a**

1. circ-FAM21C, circ-MTHFD1L, circ-NRIP3, circ-METTL25, circ-WWC2, circ-KANK1, circ-MAP3K4, circ-PARL, circ-WDFY2, circ-DHX34  
 11. circ-TGFB1, circ-MRRF, circ-CARKD, circ-LINC-PINT, circ-PICALM, circ-PRIM2, circ-SLC25A26, circ-CLK1, circ-VRK1, circ-L3MBTL2  
 21. circ-DUSP3, circ-VLDLR-AS1, circ-PRPF4B, circ-BIRC6, circ-SMU1, circ-SUN1, circ-RANGAP1, circ-MCM7, circ-TSPAN14, circ-ZNF250  
 31. circ-BBS7, circ-COMMD1, circ-MAN1B1, circ-SLC9A7, circ-WIPI1, circ-CAMK1, circ-POLR3H, circ-TM2D1, circ-TCF4, circ-TRIM37  
 41. circ-NCEH1, circ-PPM1D, circ-BCAT1, circ-SLC31A1, circ-GCLM, circ-LPGAT1, circ-C6orf106, circ-TMTC3, circ-PSMD5, circ-SLC30A5  
 51. circ-MTX2, circ-ELP6, circ-SLC25A17, circ-NR4A3, circ-LRR1, circ-MATR3, circ-POLR2E, circ-CNOT2, circ-ANKRD13C, circ-ERCC6  
 61. circ-PEX1, circ-VPS37B, circ-RNF38, circ-NR2F6, circ-PARP2, circ-PSAP, circ-DYRK1A, circ-RHEB, circ-ZNF292, circ-HAUS6  
 71. circ-MCCC2, circ-LRBA, circ-FNTA, circ-TBC1D14, circ-COPA, circ-HPS5, circ-ZDHC5, circ-MRPL30, circ-LRCH3, circ-MED13L  
 81. circ-RPS12, circ-VPS13C, circ-INTS1, circ-GRAMD4, circ-LINC01031, circ-TUBGCP4, circ-OTUD4, circ-CHD7, circ-ZNF462, circ-FAM192A  
 91. circ-EPS15, circ-CHFR, circ-LINC01473, circ-ASCC3, circ-SLC30A6, circ-VPS41, circ-CCNB1IP1, circ-LRP11, circ-PHIP, circ-EP400  
 101. circ-NRF1, circ-LILRA5, circ-PPIA, circ-USP54, circ-FIRRE, circ-CRIM1, circ-PHF8, circ-TERF2IP, circ-XPO1, circ-ATG3  
 111. circ-MPHOSPH8, circ-ABL2, circ-WARS2, circ-RPS6KC1, circ-CCNY, circ-RNF13, circ-HN1, circ-AK308944, circ-ZBTB40, circ-MTSS1  
 121. circ-TRAM1, circ-CAPZB, circ-CCT6B, circ-GIT2, circ-RERE, circ-FMN2, circ-CHD2, circ-PDE7B, circ-CCDC6, circ-NPTN  
 131. circ-DEK, circ-KIF20B, circ-KIF16B, circ-GINS1, circ-FAM196A, circ-RHOBTB3, circ-UGP2, circ-SMPD2, circ-HECTD1, circ-AHI1  
 141. circ-ST3GAL5, circ-KDM1A, circ-CSRP2BP, circ-TFF1, circ-TAB2, circ-SMARCA5, circ-DPP8, circ-SEPT10, circ-BIRC2, circ-LINC00669  
 151. circ-PPM1B, circ-OSBPL10, circ-UBXN7, circ-AGO1, circ-SYNERIP, circ-ZNF483, circ-YTHDC2, circ-DCP2, circ-ZNF639, circ-VPRBP  
 161. circ-ATAD2B, circ-PMAIP1, circ-RNF217, circ-RPS29, circ-VAV2, circ-SNRNP40, circ-LRP6, circ-CTPS1, circ-TYW1B, circ-ZFYVE26  
 171. circ-RBBP8, circ-WWC3, circ-EXOC4, circ-STAT2, circ-NDUFS1, circ-LARGE, circ-GPC1, circ-GIGYF2, circ-EMC1, circ-ARHGEP9  
 181. circ-TMCC2, circ-ARL6IP1, circ-ACLY, circ-AMOTL1, circ-EZH2, circ-ITGA3, circ-REXO4, circ-ZNF66, circ-TOPBP1, circ-EIF2B3  
 191. circ-TBCD, circ-TBC1D1, circ-CCDC57, circ-SPG11, circ-GPS2, circ-ZRANB1, circ-FOXN3, circ-STXBP5, circ-CDK8, circ-ATP13A1

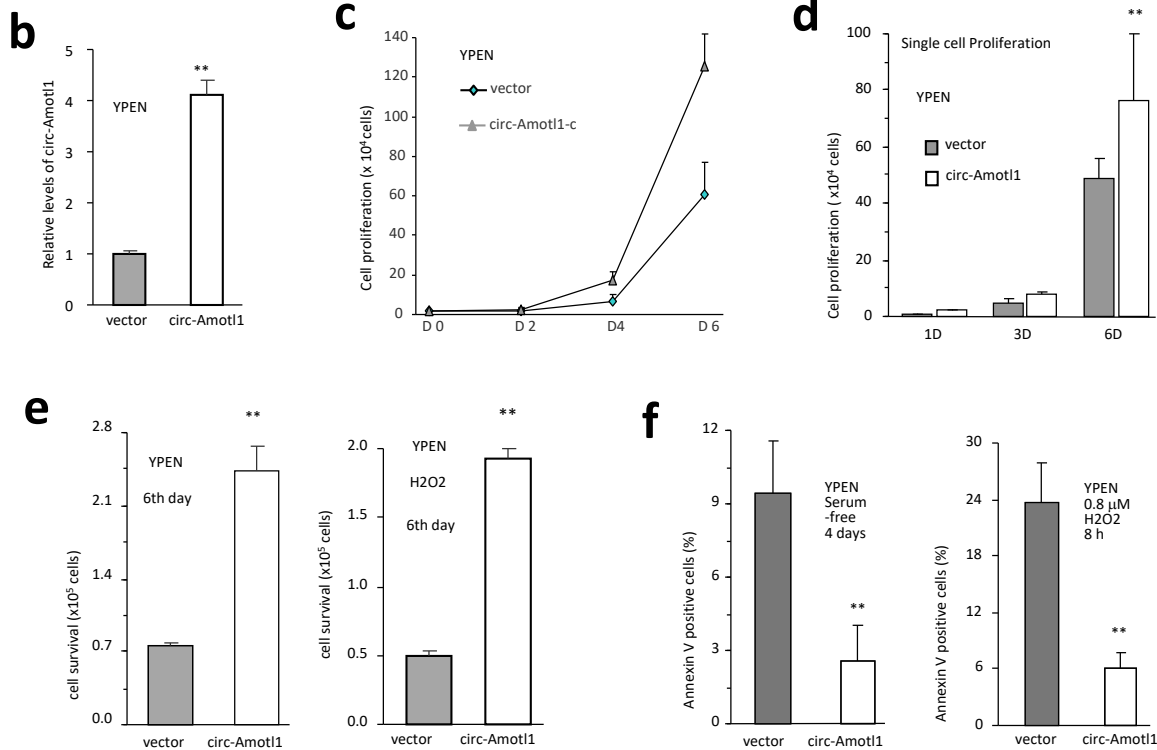

### Fig S1. Expression of circ-Amotl1 decreased cell apoptosis

(a) Names of circular RNAs in Fig 1a.

(b) Transfection with circ-Amotl1 increased expression of circ-Amotl1 in Ypen cells.

(c) Proliferation assays were performed in Ypen cells transfected with circ-Amotl1 or the control vector. Circ-Amotl1 expression enhanced cell proliferation (n=3).

(d) Single cell proliferation was determined. Over-expression of circ-Amotl1 increased proliferation of YPEN cells (n=20).

(e) Circ-Amotl1- and vector-transfected YPEN cells were subject to cell survival assay. Transfection with circ-Amotl1 enhanced cell survival.

(f) YPEN cells transfected with circ-Amotl1 expression construct or the control vector were cultured in different conditions and subject to apoptotic assays. Expression of circ-Amotl1 decreased levels of apoptosis (n=4).

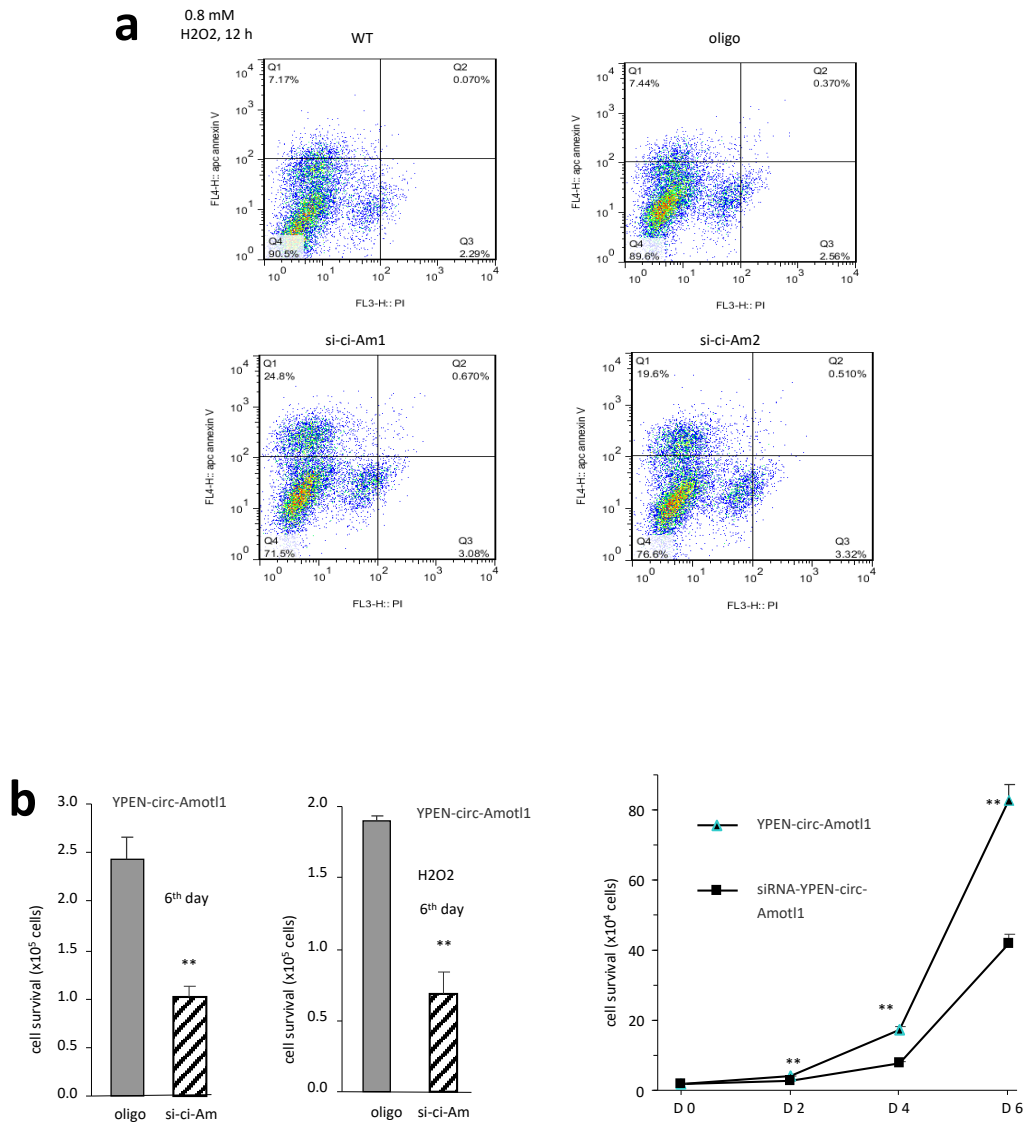

**Fig S2. Effects of endogenous circ-Amot1 on cell activities**

(a) MCF-7 cells transfected with circ-Amot1 siRNAs or a control oligo were cultured in H2O2 for 12 h. Typical pictures showed silencing circ-Amot1 increased Annexin V positive cells ( $n=4$ ).

(b) Ypen cells transiently transfected with siRNA against circ-Amot1 decreased cell survival ( $n=4$ ).

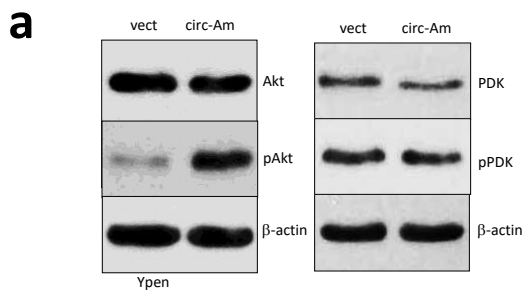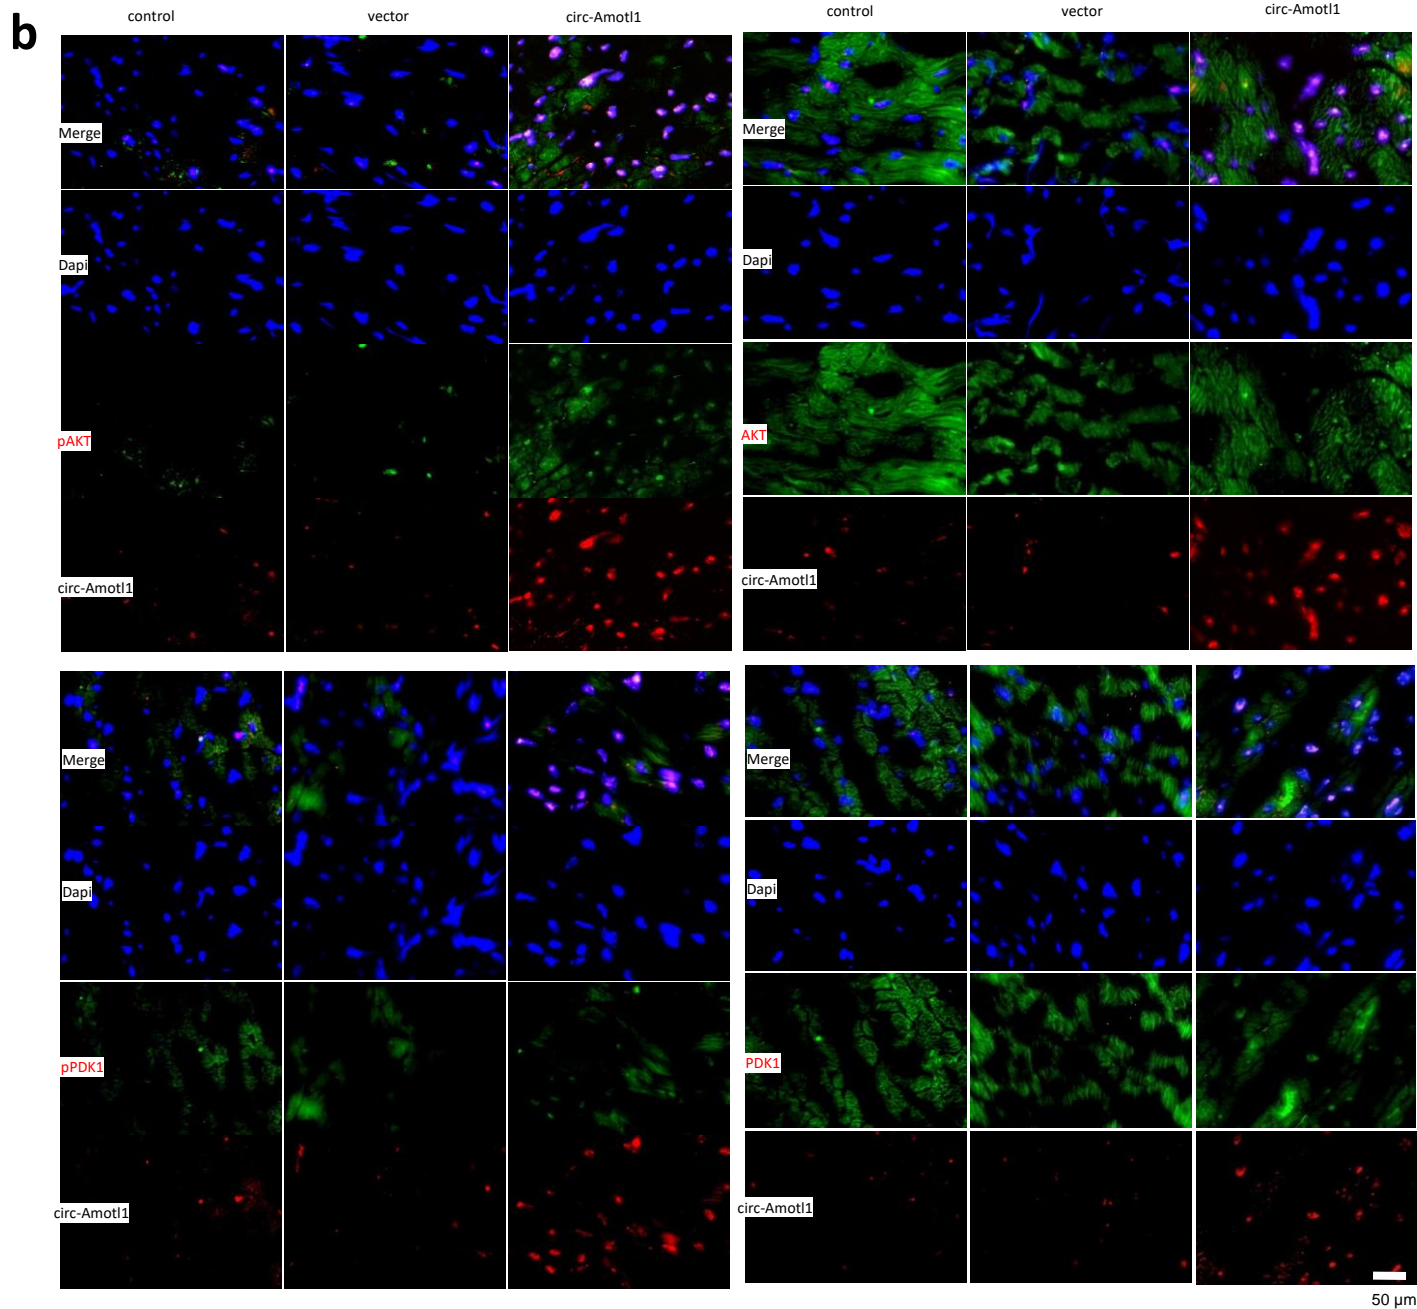

Fig S3. Circ-Amotl1 expression induced Akt activation.

(a) Western blot analysis revealed that ectopic expression of circ-Amotl1 had no effect on levels of Akt, PDK1, and pPDK1, but induced activation of Akt.

(b) Heart tissues were stained with DAPI (blue), circ-AMOTL1 (red) and green fluorescence showing expression of pAKT, AKT, pPDK1 and PDK1. Delivery of circ-Amotl1 enhanced pAKT expression, and pAKT, AKT, pPDK1 and PDK1 nuclear translocation.

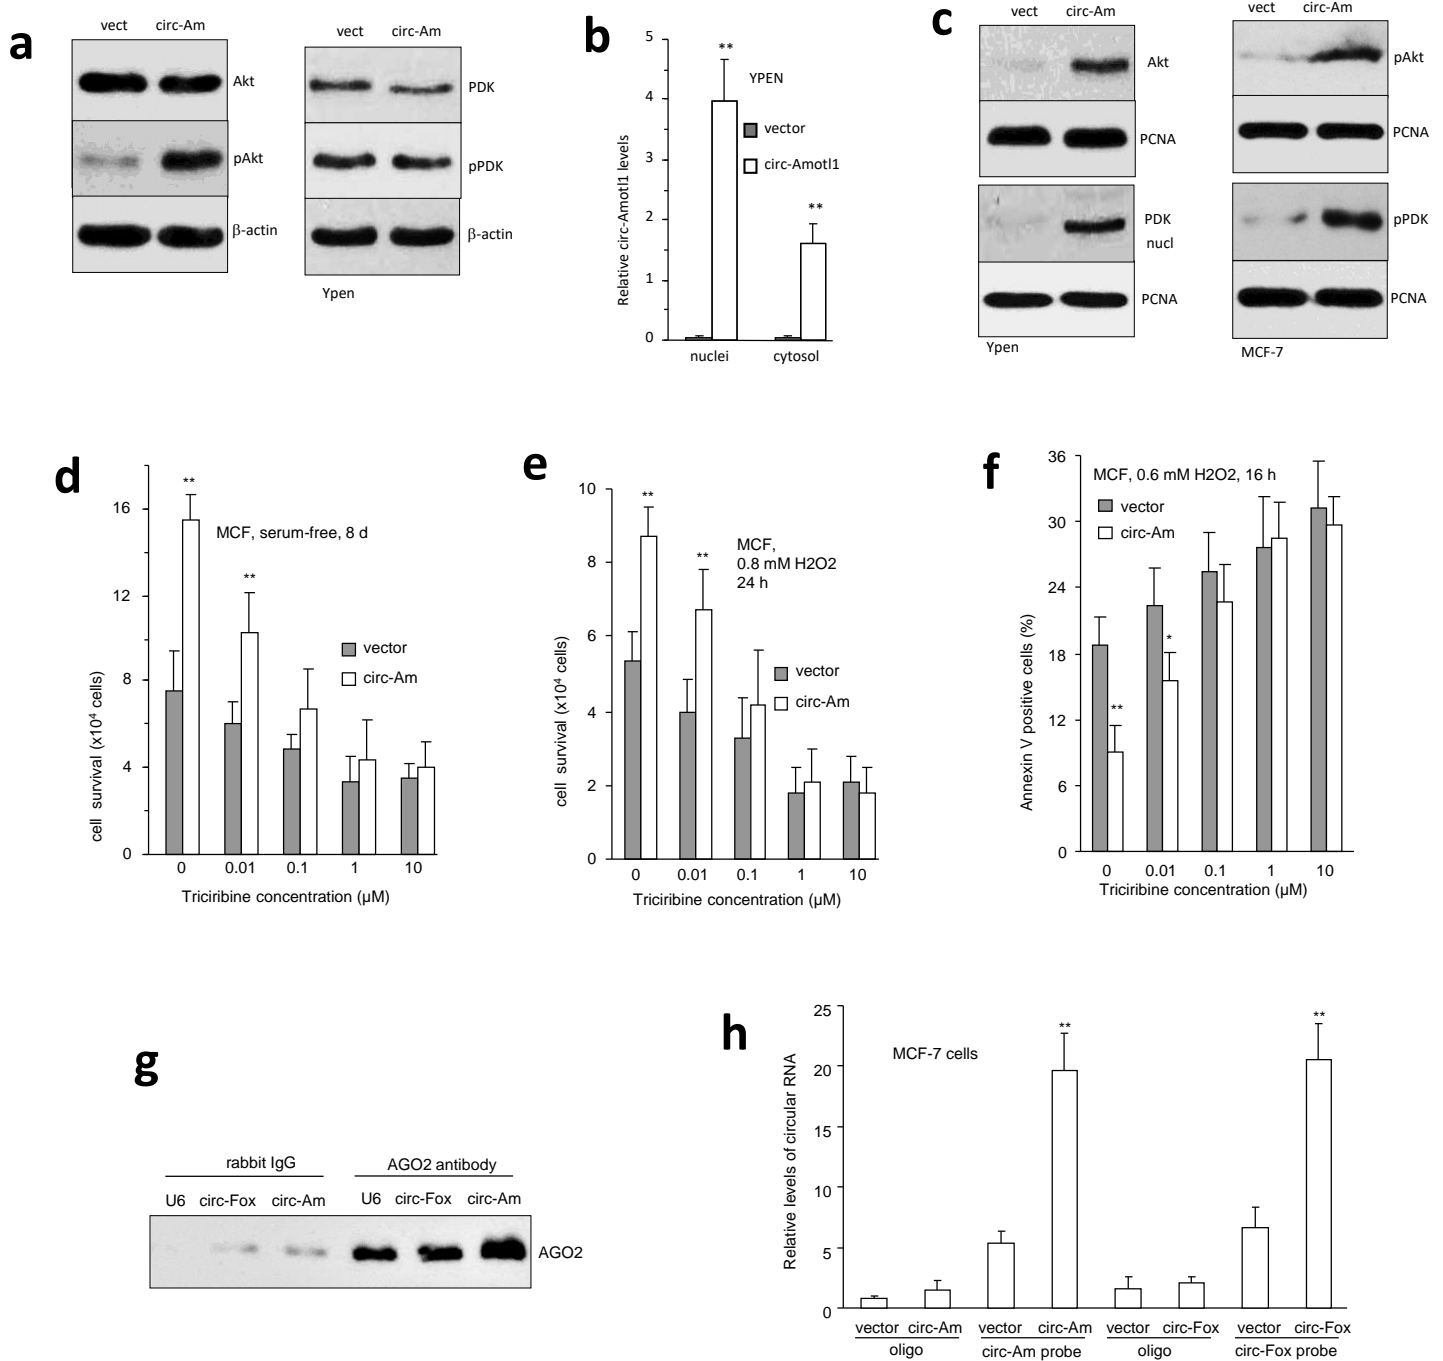

Fig S4. Effect of circ-Amotl1 expression on Akt signalling.

- (a) Lysates prepared from MCF-7 cells transfected with circ-Amotl1 siRNA or an control oligo, were mixed with the DNA probe or an control oligo. Silencing circ-Amotl1 with siRNA decreased circ-Amotl1 expression in the input ( $n=6$ ).
- (b) Silencing circ-Amotl1 resulted in pulling down decreased levels of Akt and PDK1 with the probe complementary to circ-Amotl1.
- (c) Ectopic expression of circ-Amotl1 induced nuclear translocation of Akt and PDK1 in Ypen (left) and MCF-7 (right) cells.
- (d-e) Treatment with Akt inhibitor Triciribine abolished the effects of circ-Amotl1 on cell survival when the cells were cultured in serum-free medium (d) or treated with H<sub>2</sub>O<sub>2</sub> (e).
- (f) Treatment with Akt inhibitor Triciribine abolished the effects of circ-Amotl1 on cell apoptosis.
- (g) The anti-Ago2 antibody was able to precipitate Ago2 protein.
- (h) The probes of both circ-Foxo3 and circ-Amotl1 could pull down circ-Foxo3 and circ-Amotl1 respectively ( $n=4$ ).

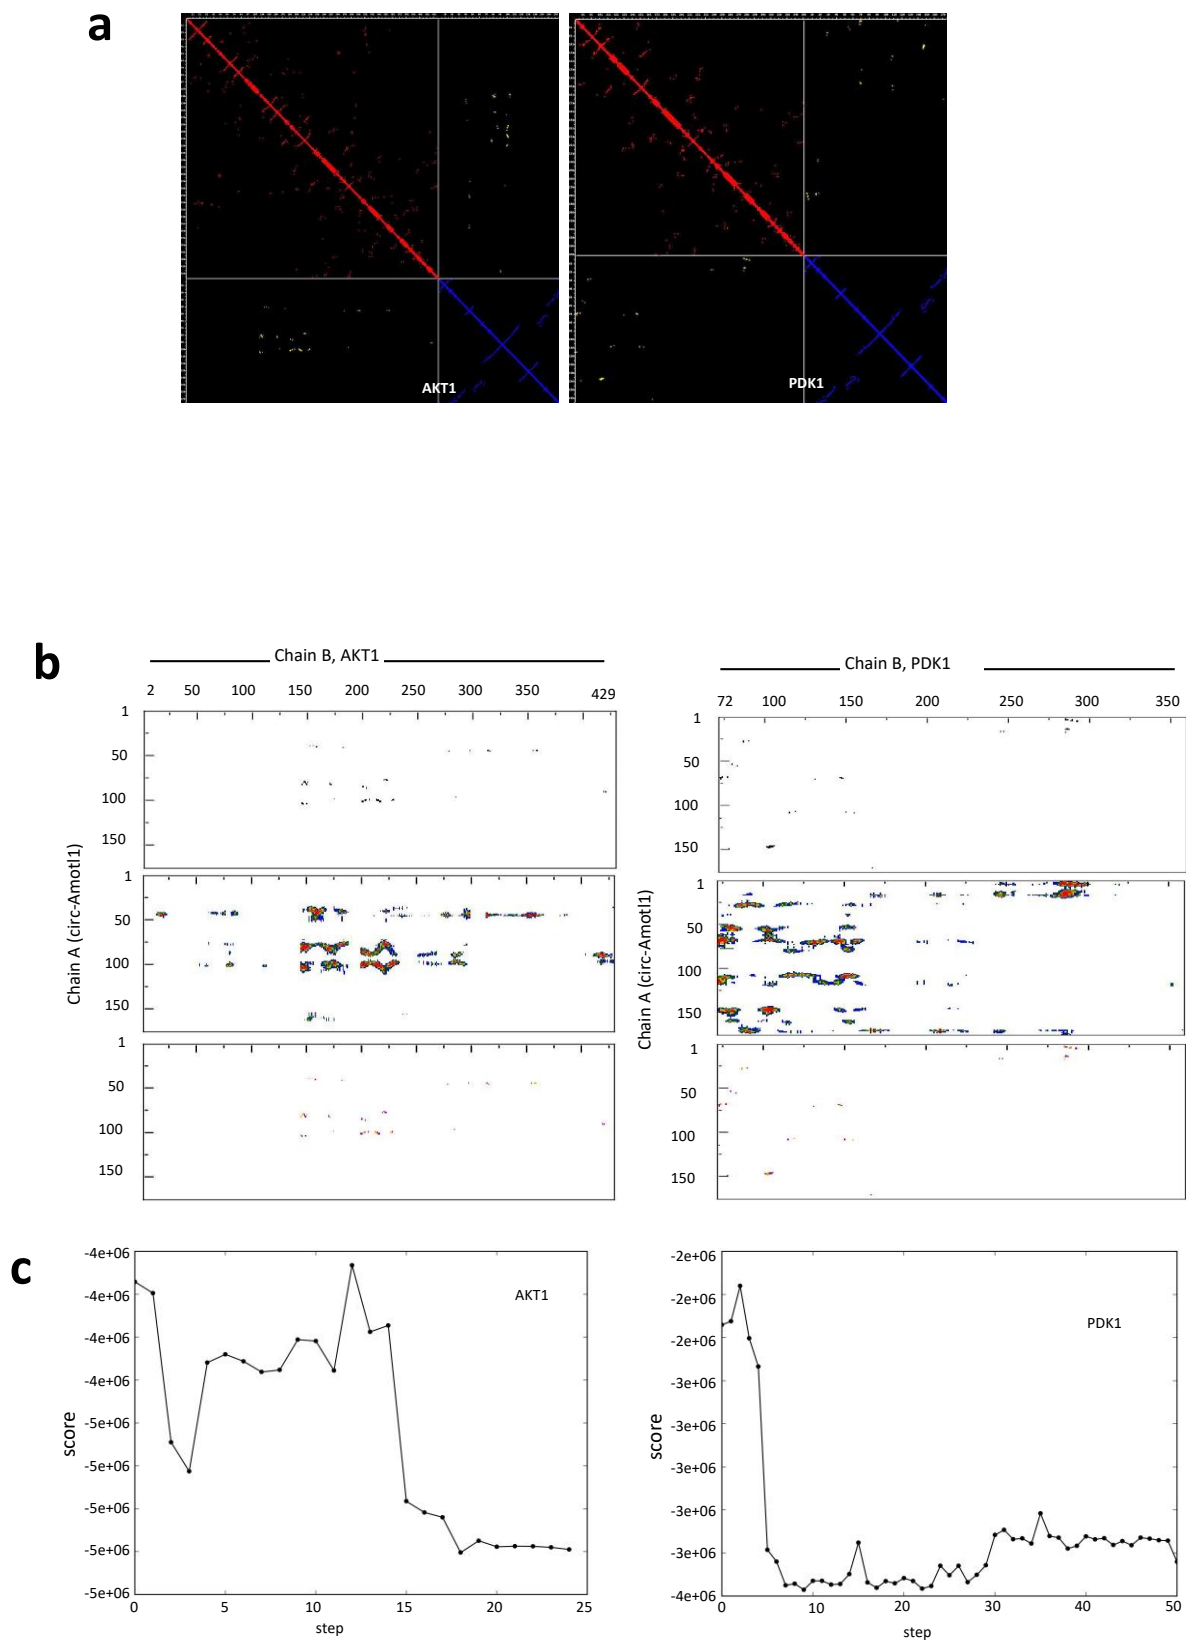

Fig S5. Computational analysis of circ-Amotl1 interacting with Akt and PDK1.

(a) The contact map in the binding residues between circ-Amotl1 and Akt or PDK1.

(b) The residue-level resolution contact maps in the binding residues between circ-Amotl1 and Akt or PDK1.

(c) Refinement of the best docked circ-Amotl1-Akt model and circ-Amotl1-PDK1 model showing MC score vs. steps of simulation.



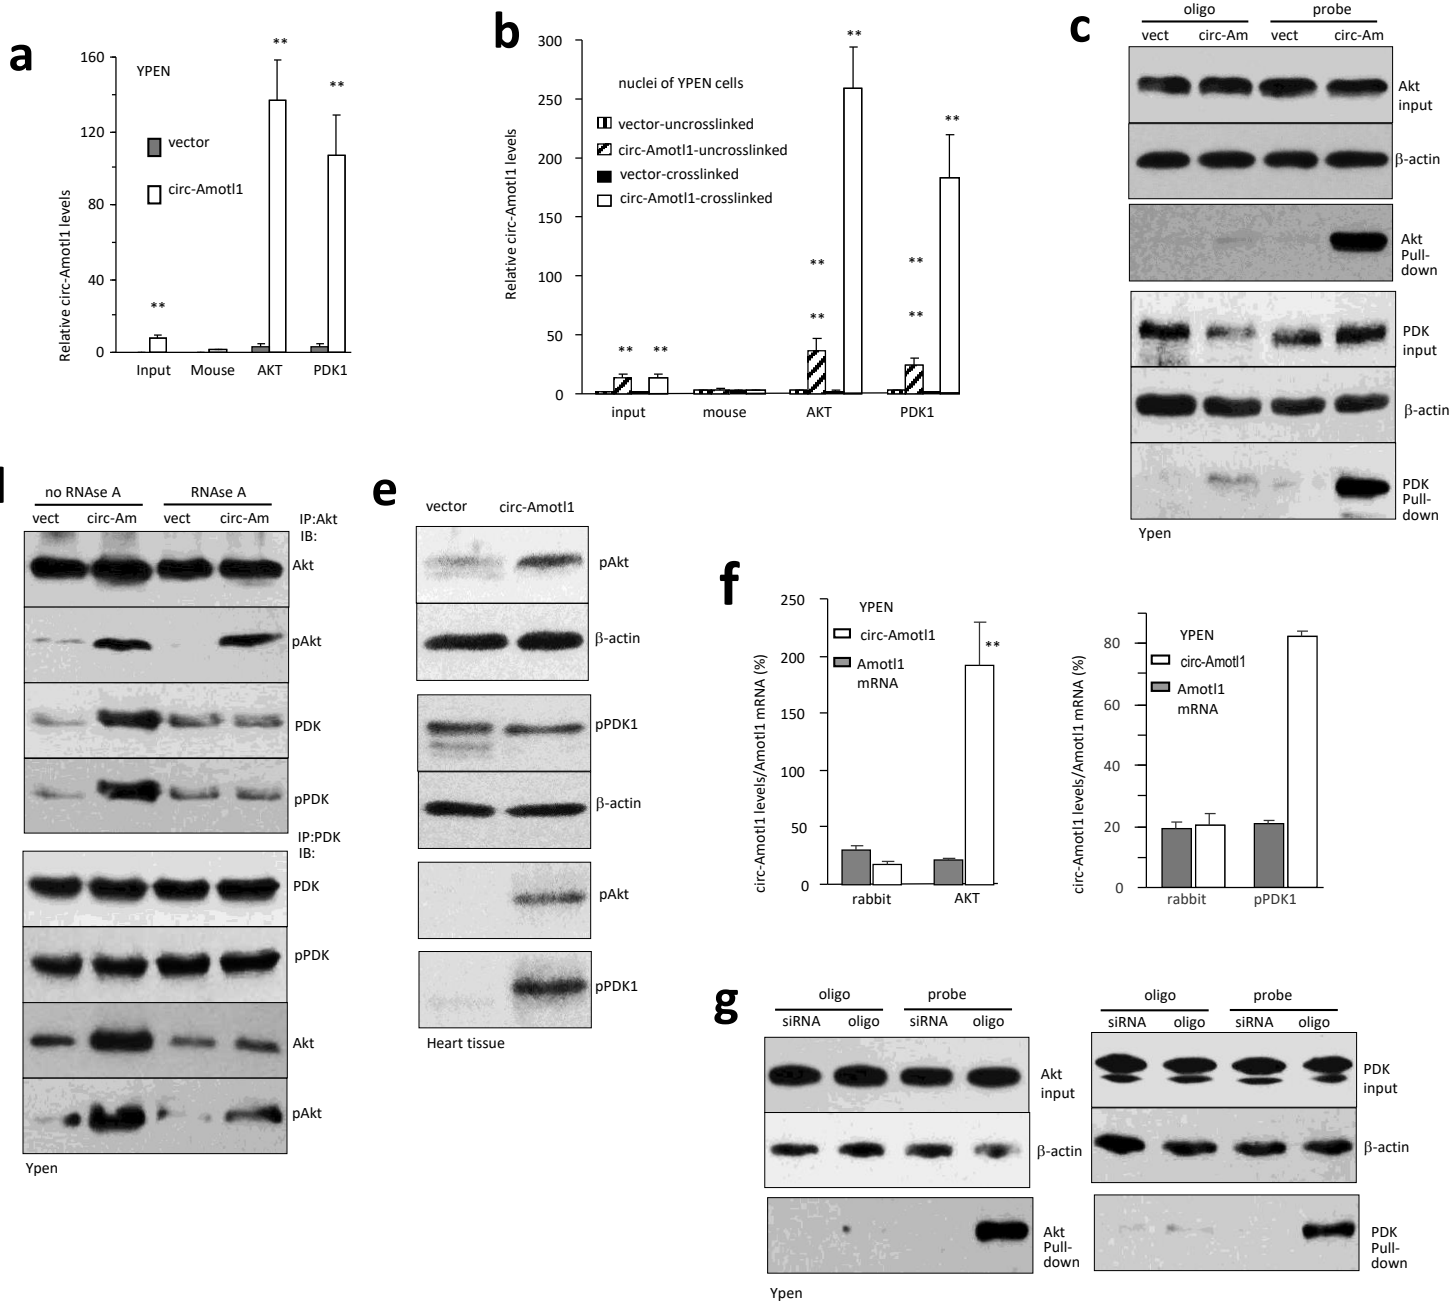

**Fig S6. Circ-Amot1 interacted with Akt and PDK1**

(a) Lysates prepared from YPEN cells transfected with vector control or circ-Amot1, were subject to immuno-precipitation, followed by real-time PCR amplifying circ-Amot1. Anti-AKT and anti-PDK1 antibodies precipitated more circ-Amot1 from cells transfected with circ-Amot1 than from control ( $n=6$ ).

(b) To confirm the interaction of circ-Amot1 with AKT and PDK1 in nuclei, we performed the precipitation assay, after cross-linking and nuclear isolation. Cross-linking significantly increased precipitation of circ-Amot1 by AKT and PDK1. RIP assays indicated that anti-Akt and anti-PDK1 antibodies precipitated more circ-Amot1 from cells transfected with circ-Amot1 than from control. In uncross-linked samples, the antibodies precipitated less circ-Amot1 compared to cross-linked samples ( $n=6$ ).

(c) The circ-Amot1 probe precipitating circ-Amot1 could pull-down Akt and PDK1.

(d) In the lysate prepared from circ-Amot1-transfected Ypen cells, anti-Akt antibody precipitated increased levels of PDK1 and pPDK1, while anti-PDK1 antibody precipitated more Akt and pAkt relative to controls, suggesting both Akt and PDK1 bound to the same circ-Amot1. Treatment with RNase A abolished the interaction.

(e) In heart tissues, circ-Amot1 precipitation pulled down pAkt and pPDK1.

(f) Antibodies against Akt and pPDK1 precipitated circ-Amot1 but not the linear Amot1 mRNA.

(g) Lysates prepared from Ypen cells transfected with circ-Amot1 siRNA or an control oligo, were mixed with the DNA probe or an control oligo. Silencing circ-Amot1 resulted in pulling down decreased levels of Akt and PDK1 with the probe complementary to circ-Amot1.

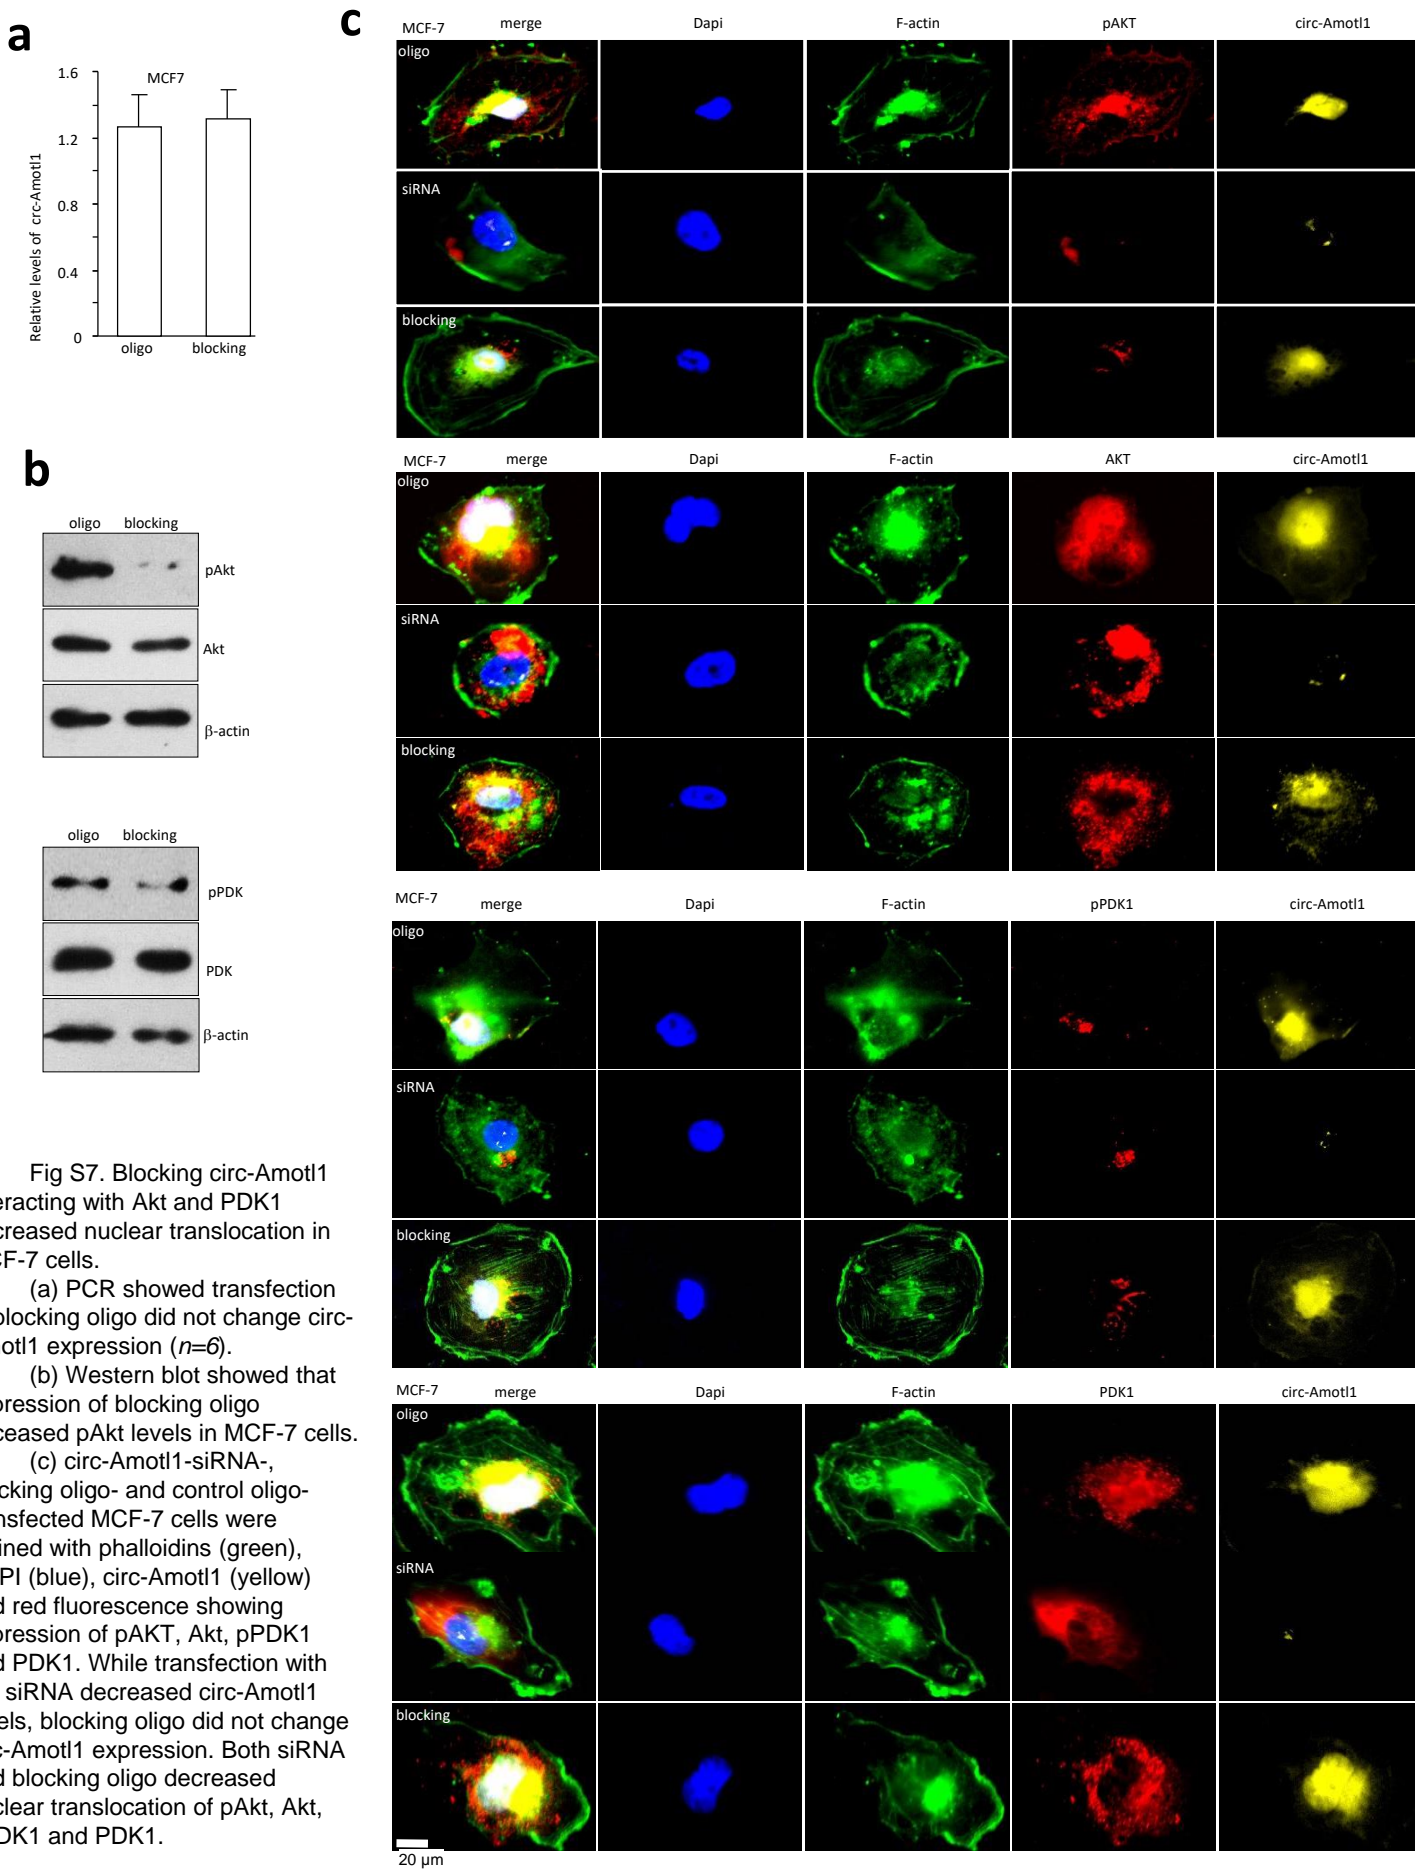



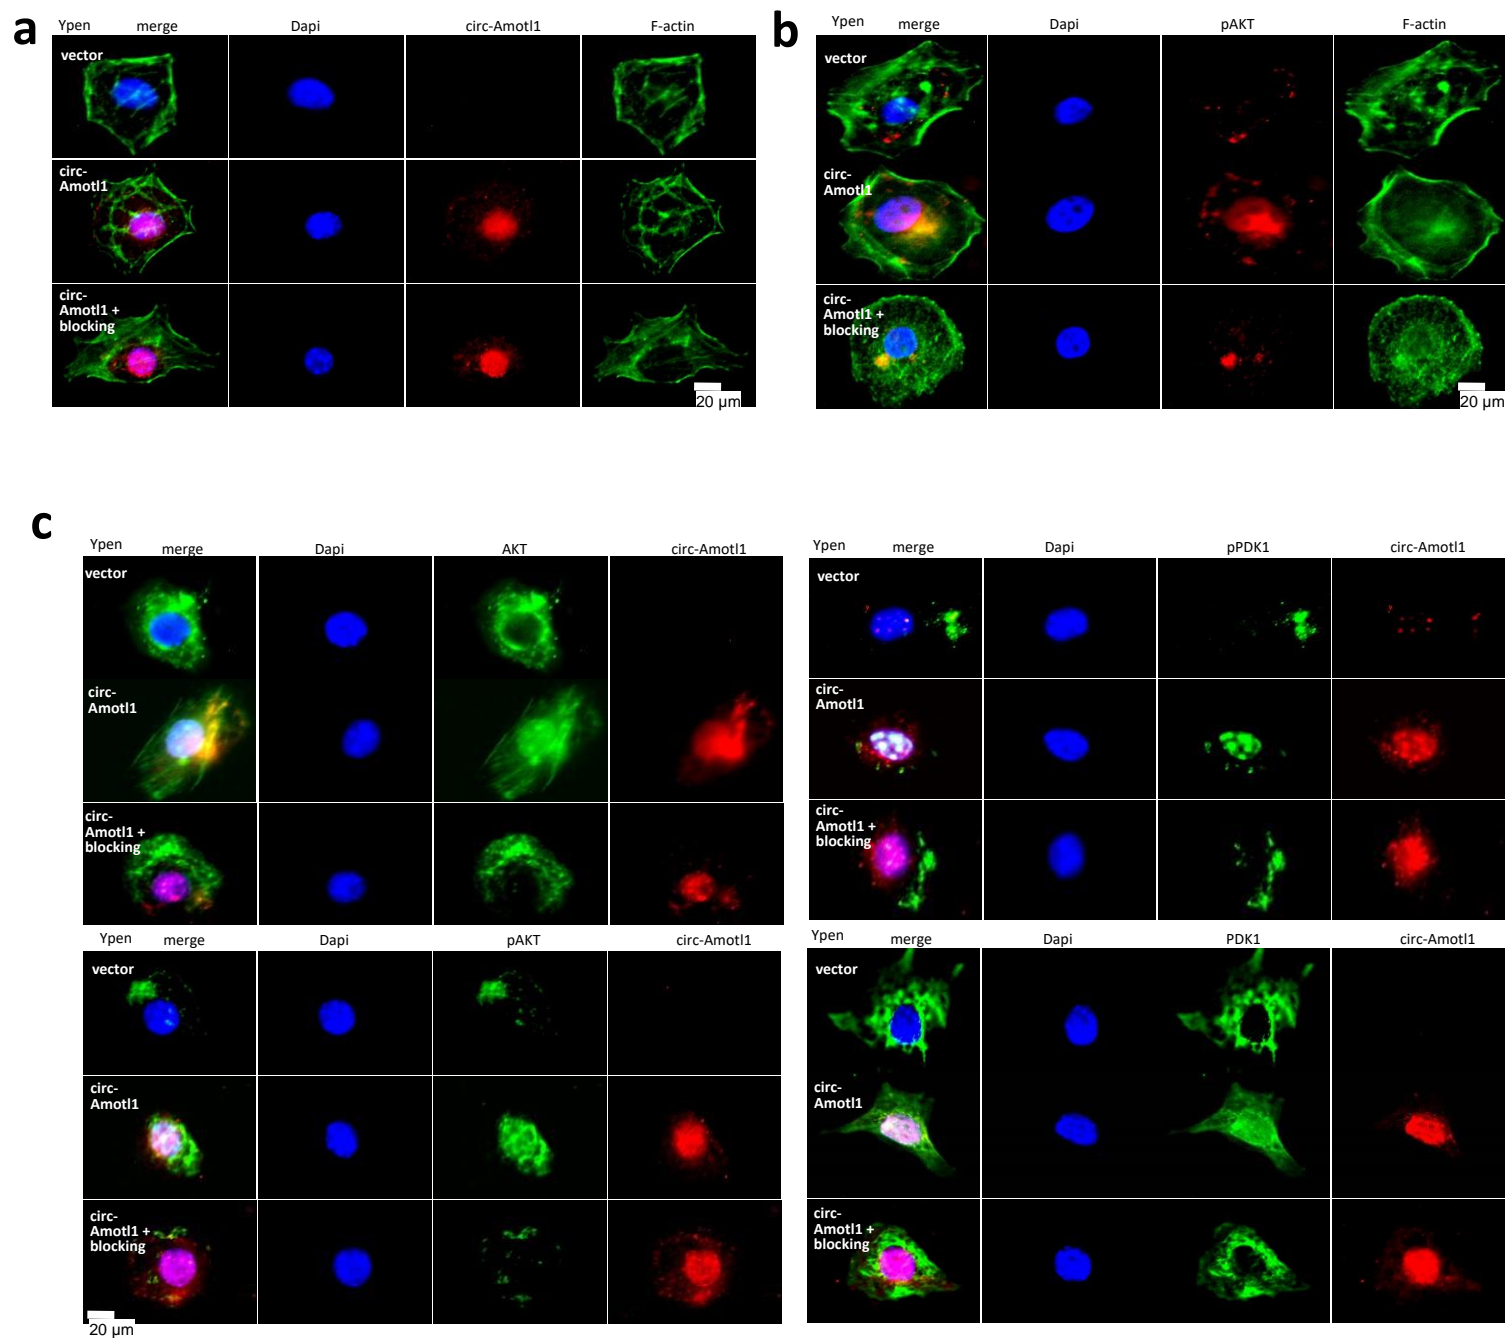

Fig S8. Blocking circ-Amotl1 interacting with Akt and PDK1 decreased nuclear translocation in Ypen cells.

- (a) circ-Amotl1-, circ-Amotl1-, blocking oligo-, and control vector-transfected YPEN cells were stained with phalloidins (green), DAPI (blue) and circ-Amotl1 (red). The blocking oligo did not affect circ-Amotl1 expression.
- (b) Cells were stained with phalloidins (green), DAPI (blue) and pAkt (red). The blocking oligo decreased pAkt expression.
- (c) The cells were stained with DAPI (blue), circ-Amotl1 (red), and red fluorescence showing expression of pAKT, Akt, pPDK1 and PDK1. Transfection of circ-Amotl1 increased circ-Amotl1 and pAKT expression, and promoted circ-Amotl1, pAkt, Akt, pPDK1 and PDK1 nuclear translocation. Transfection with the blocking oligo inhibited these processes.

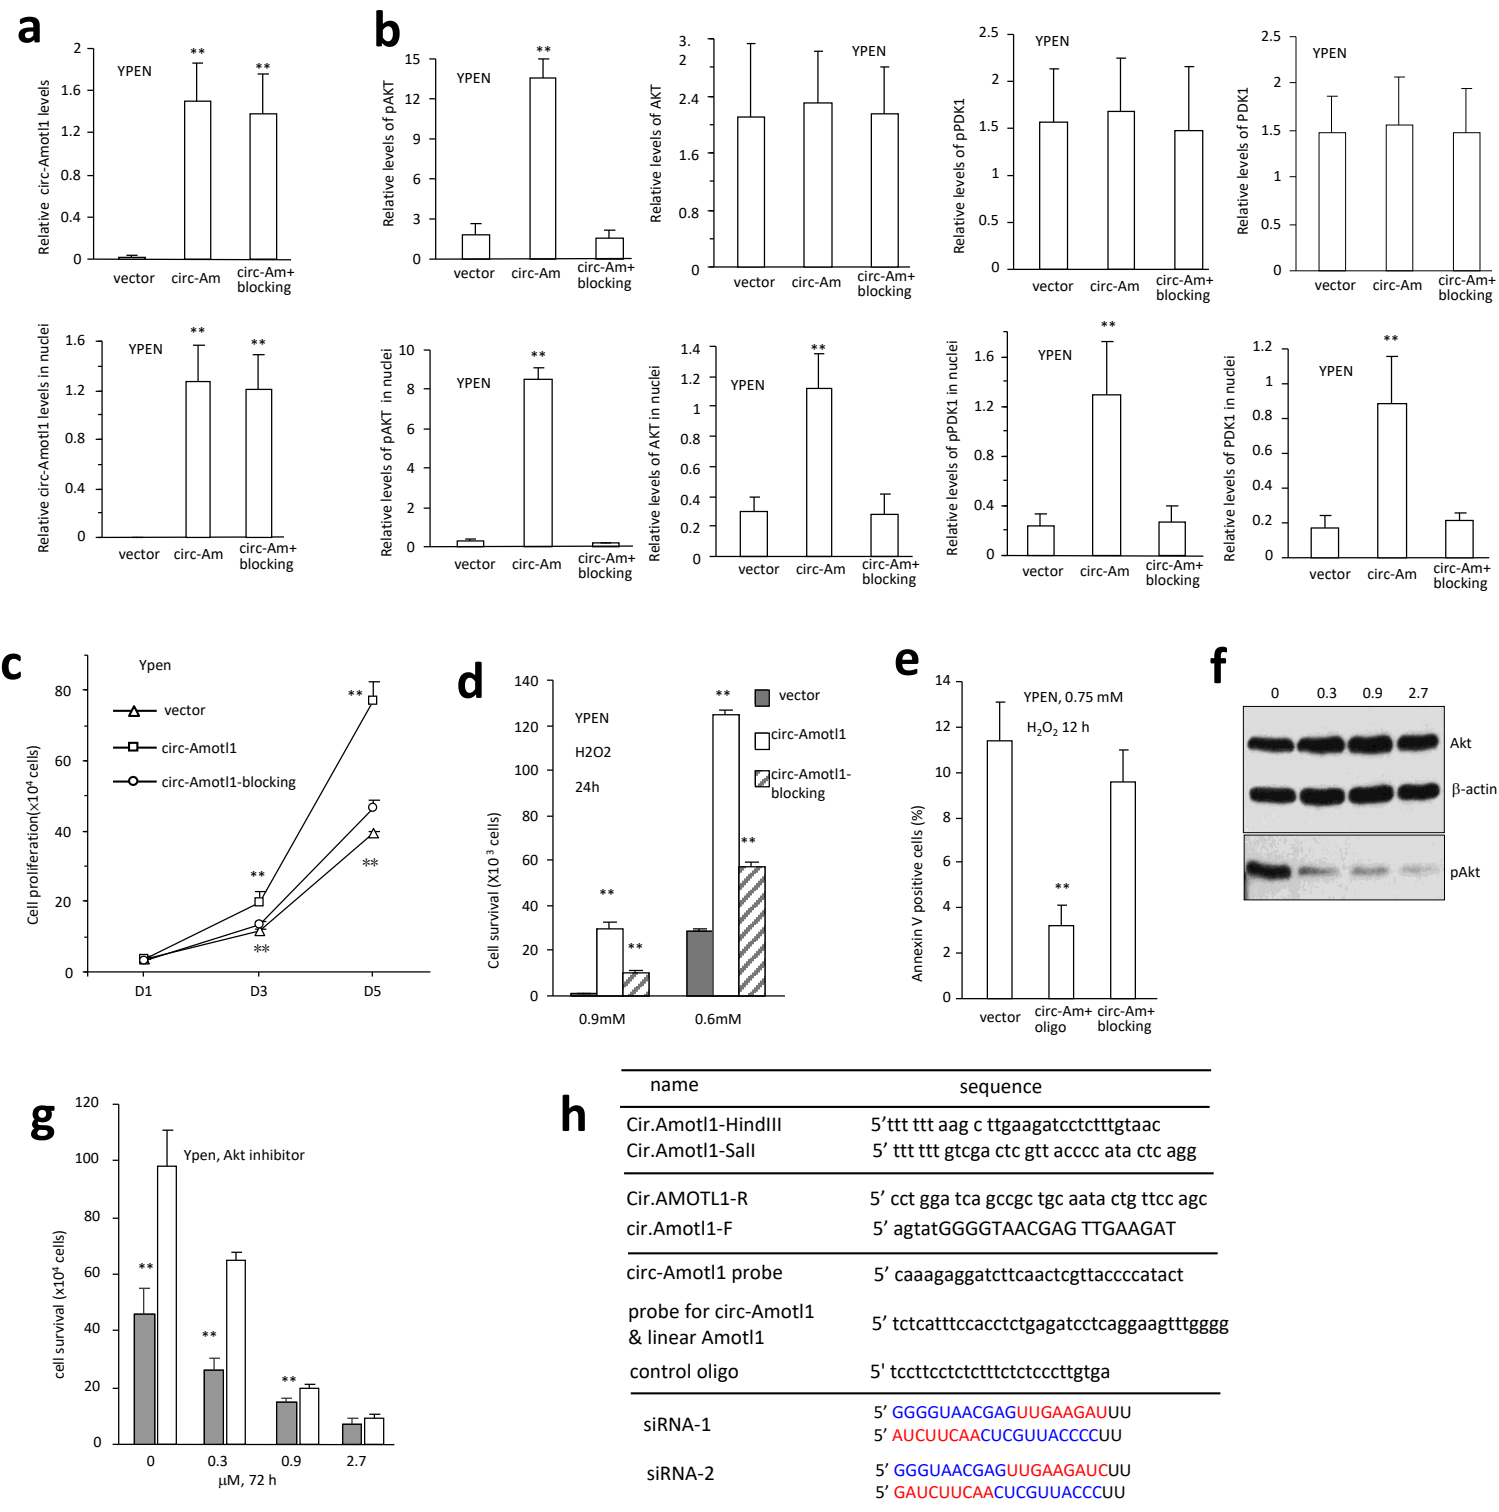

Fig S9. Blocking circ-Amotl1 modulated cellular activities. (a) Image J analyses showed that the blocking oligo did not affected nuclear translocation of circ-Amotl1 ( $n=6$ ). (b) Image J analyses showed that the blocking oligo decreased nuclear translocation of pAkt, Akt, pPDK1 and PDK1 ( $n=6$ ). (c) Ypen cells transfected with the blocking oligo or a control oligo were cultured in H<sub>2</sub>O<sub>2</sub> for 10 h or 12 h. Transfection with the blocking oligo increased Annexin V positive cells ( $n=4$ ). (d) While expression of circ-Amotl1 increased, transfection with the blocking oligo decreased proliferation of Ypen cells. (e) Transfection with the blocking oligo decreased survival of Ypen cells. (f) Treatment with Akt inhibitor did not affect Akt expression, but decreased Akt phosphorylation. (g) Treatment with Akt inhibitor decreased cell survival. (h) Sequences of oligos used in the study. Cloning primers: Cir.Amotl1-HindIII and Cir.Amotl1-Sall; PCR primers: Cir.Amotl1-R and Cir.Amotl1-F
